# Supplementary material for: Marula oil nanoemulsion improves motor function in experimental parkinsonism via mitigation of inflammation and oxidative stress
Source: PubMed Central journal article supplement (PMC10729903; doi:10.3389/fphar.2023.1293306), 2023-11-23
Supplement: DataSheet1.pdf [file DataSheet1.pdf]

**Supplementary Table 1. ANOVA analysis for (Y1), and (Y2) of the prepared M-NE.**

| <b>Response 1: Droplet size</b>     |                |                   |             |          |         |
|-------------------------------------|----------------|-------------------|-------------|----------|---------|
| Source                              | Sum of Squares | Degree of freedom | Mean Square | F value  | P value |
| Model                               | 14621.74       | 2                 | 7310.87     | 12492.41 | 0.0063  |
| A-Type of surfactant                | 12328.77       | 1                 | 12328.77    | 21066.72 | 0.0044  |
| B-Total surfactant and cosurfactant | 2292.97        | 1                 | 2292.97     | 3918.11  | 0.0102  |
| Residual                            | 0.5852         | 1                 | 0.5852      |          |         |
| Cor Total                           | 14622.33       | 3                 |             |          |         |
| <b>Response 2: ZP</b>               |                |                   |             |          |         |
| Source                              | Sum of Squares | Degree of freedom | Mean Square | F value  | P value |
| Model                               | 55.96          | 2                 | 27.98       | 1790.85  | 0.0167  |
| A-Type of surfactant                | 42.97          | 1                 | 42.97       | 2749.95  | 0.0121  |
| B-Total surfactant and cosurfactant | 13.00          | 1                 | 13.00       | 831.75   | 0.0221  |
| Residual                            | 0.0156         | 1                 | 0.0156      |          |         |
| Cor Total                           | 55.98          | 3                 |             |          |         |
